# Supplementary material for: OsWRKY114 Inhibits ABA-Induced Susceptibility to Xanthomonas oryzae pv. oryzae in Rice
Source: MDPI journal article supplement (doi:10.3390/ijms23158825), 2022-08-08
Supplement: s1 [file s1]

**A**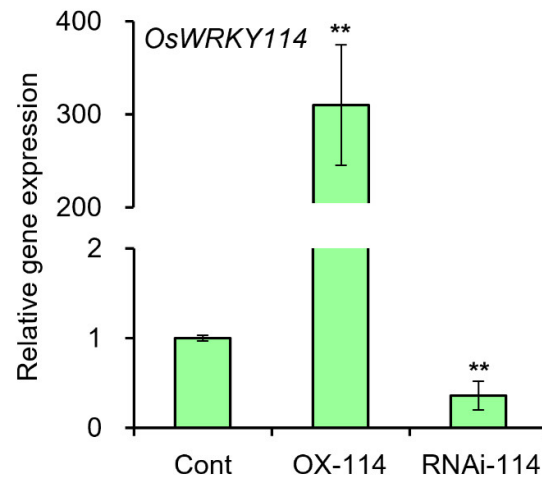**B**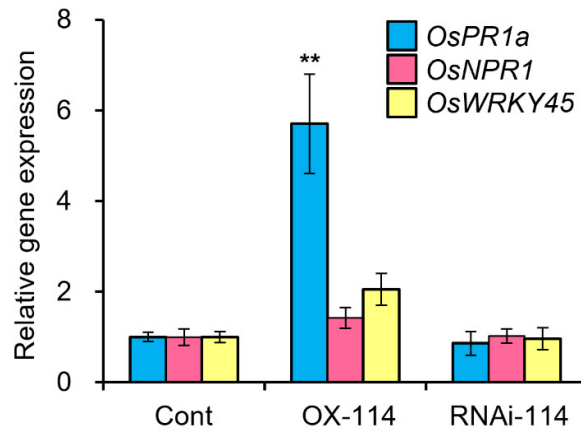

**Figure S1.** Relative transcript levels of SA marker genes in protoplast. **(A, B)** Relative transcript levels of *OsWRKY114* **(A)** and SA marker genes such as *OsNPR1* and *OsWRKY45* **(B)** in protoplast. Rice protoplasts were transfected with or without constructs pEarleyGate104/*OsWRKY114* and pB7GWIWG(II)/*OsWRKY114*-RNAi, respectively. After an incubation of 8 h, total RNA was extracted for RT-qPCR analysis. *OsActin* was used as an internal control. Data are shown as means  $\pm$  SD. \*\*  $p < 0.01$ , by  $t$ -test relative to control sample.

| Gene             | Primer sequence            | Purpose |
|------------------|----------------------------|---------|
| <i>OsWRKY114</i> | F: CACCCATGTTCCAAGTGACA    | qRT-PCR |
|                  | R: ATCGTCAGGGTGACCATTG     | qRT-PCR |
| <i>OsPR1a</i>    | F: GGAAGTACGGCGAGAACATC    | qRT-PCR |
|                  | R: TGGTCGTACCACTGCTTCTC    | qRT-PCR |
| <i>Chitinase</i> | F: CGCCCTAAGATAGAGTAACATCG | qRT-PCR |
|                  | R: CAAGAGCAACAAACAGTGGC    | qRT-PCR |
| <i>OsABI5</i>    | F: GCAGGAGGAAGCGGTTTATG    | qRT-PCR |
|                  | R: AGTGTTACCTGTCGGTCGTT    | qRT-PCR |
| <i>OsVP1</i>     | F: ACATAGACCAGCTCCTCGAC    | qRT-PCR |
|                  | R: GGACATGGCGTCCTCTATCA    | qRT-PCR |
| <i>TRAB1</i>     | F: CCGGCTGTCAACAACAGCTC    | qRT-PCR |
|                  | R: GAAACCCATCGCACCAGCAG    | qRT-PCR |
| <i>OsZIP23</i>   | F: GAGATCACGCTGGAGGAGTT    | qRT-PCR |
|                  | R: ACCATCGGAGGGAACACATT    | qRT-PCR |
| <i>OsZIP72</i>   | F: TGTATTGCTGACGTTTCGAC    | qRT-PCR |
|                  | R: GAGCAGCTCGTCCATGTTC     | qRT-PCR |
| <i>OsLEA3-1</i>  | F: ATACCAAGGAGGCGACGAAG    | qRT-PCR |
|                  | R: GTGCTGGAGGTCTTGTCCTT    | qRT-PCR |
| <i>OsLEA3-2</i>  | F: AAGAACAAGCTGGGCGAGTA    | qRT-PCR |
|                  | R: CTTGAACTCCGTCGCCTTC     | qRT-PCR |
| <i>OsLEA4</i>    | F: CCGACGAGAAGAAGGAGGTG    | qRT-PCR |
|                  | R: TTATGGAGCCTGTGCTGGAT    | qRT-PCR |
| <i>OsLEA5</i>    | F: GCTCACCTACACCCTCAAGT    | qRT-PCR |
|                  | R: GATCTTGGCCGGTATCTCCA    | qRT-PCR |
| <i>OsEm1</i>     | F: AGACGAGGAAGGAGCAGAT     | qRT-PCR |
|                  | R: GGACTTGGTCTTGTAAGTTG    | qRT-PCR |
| <i>OsNCED1</i>   | F: CTACATCCCTCCTGCTGCTT    | qRT-PCR |
|                  | R: CTACCAACTGCTCGTCCTCT    | qRT-PCR |
| <i>OsNCED3</i>   | F: TTCGCCATCACCGAGAACTA    | qRT-PCR |
|                  | R: GAGCATCTCCTGGAGCTTGA    | qRT-PCR |
| <i>OsNCED4</i>   | F: GTCCAAGCCGTACCTCAAGT    | qRT-PCR |
|                  | R: TCCTGGAGCTTGAACACGAT    | qRT-PCR |
| <i>OsNPR1</i>    | F: CACGCCTAAGCCTCGGATTA    | qRT-PCR |
|                  | R: TCAGTGAGCAGCATCCTGACTAG | qRT-PCR |
| <i>OsWRKY45</i>  | F: GGACGCAGCAATCGTCCGGG    | qRT-PCR |
|                  | R: CGGAAGTAGGCCTTTGGGTGC   | qRT-PCR |
| <i>OsActin</i>   | F: CATTGGTGCTGAGCGTTTCC    | qRT-PCR |
|                  | R: CTCCTTGCTCATCCTGTCAGC   | qRT-PCR |

**Table S1.** Sequence of primers used in this study.
